# Supplementary material for: Novel application of an automated-machine learning development tool for predicting burn sepsis: proof of concept
Source: PubMed Central journal article supplement (PMC7378181; doi:10.1038/s41598-020-69433-w), 2020-07-23
Supplement: 41598_2020_69433_MOESM1_ESM.pdf [file 41598_2020_69433_MOESM1_ESM.pdf]

**SCIENTIFIC REPORTS – SUPPLEMENTAL DATA**

**NOVEL APPLICATION OF AN AUTOMATED-MACHINE LEARNING  
DEVELOPMENT TOOL FOR PREDICTING BURN SEPSIS: PROOF OF CONCEPT**

Nam K. Tran, PhD, HCLD (ABB), FAACC<sup>1\*</sup>, Samer Albahra, MD<sup>1</sup>;  
Tam N. Pham, MD, FACS<sup>2</sup>; James H. Holmes IV, MD, FACS<sup>3</sup>;  
David Greenhalgh, MD, FACS<sup>4</sup>; Tina L. Palmieri, MD, FACS, FCCM<sup>4</sup>;  
Jeffery Wajda, DO, MS, FACEP<sup>5</sup>; and Hooman H. Rashidi, MD, FASCP<sup>1\*</sup>

**Figure S1. Flow Diagram**

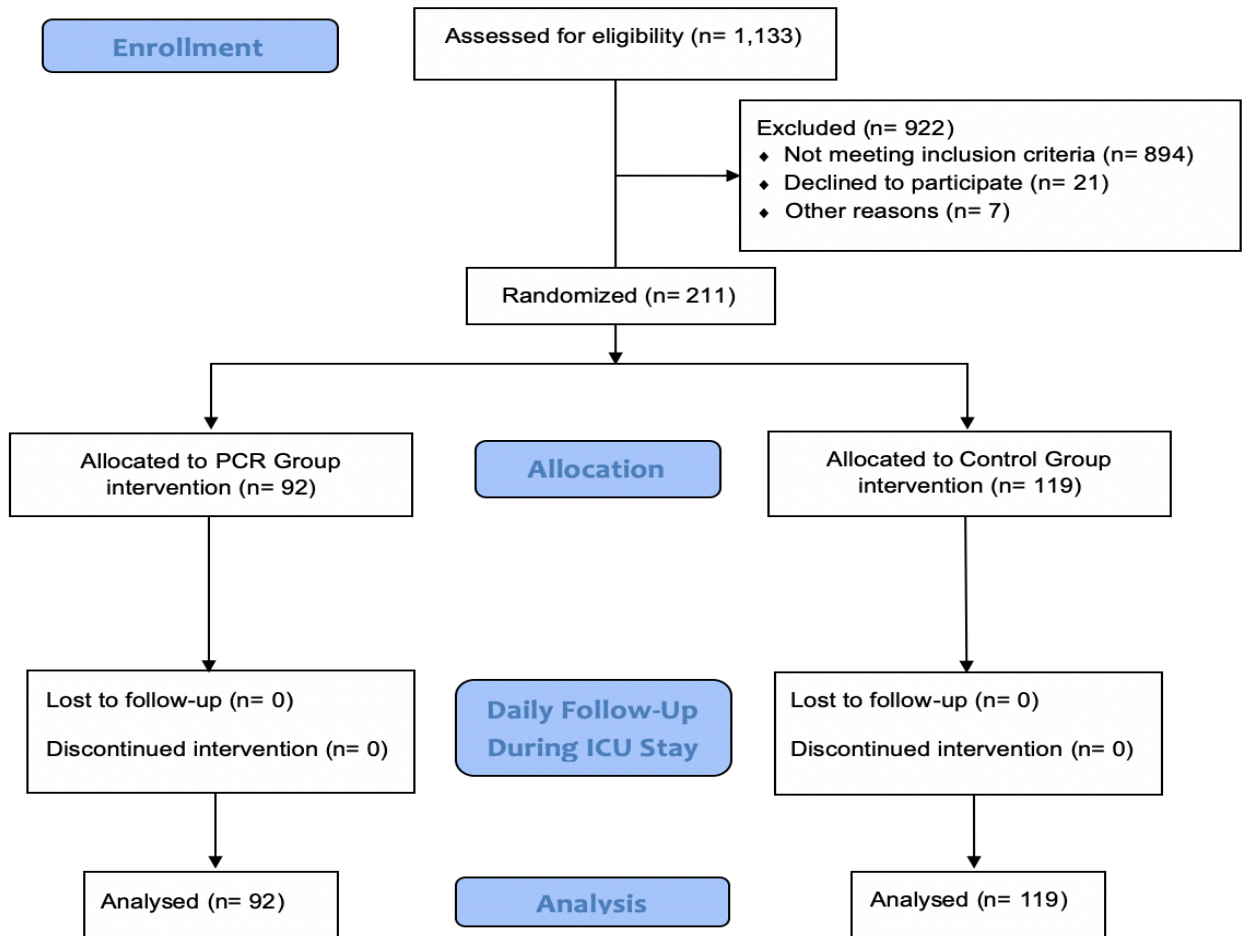

**Table S1. Comparison of our Non-automated versus Automated machine learning**

|                                                                | <b>Our Non-Automated ML Approach</b>                       | <b>Our Automated ML (MILO) Approach</b>                                                                                                                                                                        |
|----------------------------------------------------------------|------------------------------------------------------------|----------------------------------------------------------------------------------------------------------------------------------------------------------------------------------------------------------------|
| <b>Algorithms*</b>                                             | KNN, LR, SVM, DNN and RF                                   | KNN, LR, SVM, DNN, RF, NB and GBM                                                                                                                                                                              |
| <b>Scaler(s) used</b>                                          | Standard scaler                                            | standard scaler, Min/max, and no scaler                                                                                                                                                                        |
| <b>Feature Selector and/or transformers used</b>               | ANOVA F Value Select percentile (10% increments)           | <ul style="list-style-type: none"> <li>• ANOVA F Value Select percentile (25% increments)</li> <li>• Random Forest Feature Importances (25% increments) and</li> <li>• principal component analysis</li> </ul> |
| <b>Hyperparameter Searchers</b>                                | Grid search                                                | <ul style="list-style-type: none"> <li>- Grid search and</li> <li>- Random Search x2</li> </ul>                                                                                                                |
| <b>Scorer(s) used in the training/initial validation phase</b> | Accuracy                                                   | <ul style="list-style-type: none"> <li>• Accuracy</li> <li>• ROC-AUC</li> <li>• F1</li> </ul>                                                                                                                  |
| <b>Model Assessments</b>                                       | Generalization assessment performed on best accuracy model | Generalization assessment on all pipelines                                                                                                                                                                     |

**Table S2. Number of Models Generated by MILO for Sepsis Data**

| Algorithm | Search   | Scalers | Feature Selectors | (Hyperparameter Search count x k-fold of 10) + 3 scorers | Total         |
|-----------|----------|---------|-------------------|----------------------------------------------------------|---------------|
| GBM       | Grid     | 3       | 9                 | (30 x 10) + 3                                            | 8181          |
| GBM       | Random 1 | 3       | 9                 | (100 x 10) + 3                                           | 27081         |
| GBM       | Random 2 | 3       | 9                 | (100 x 10) + 3                                           | 27081         |
| KNN       | Grid     | 3       | 9                 | (56 x 10) + 3                                            | 15201         |
| KNN       | Random 1 | 3       | 9                 | (100 x 10) + 3                                           | 27081         |
| KNN       | Random 2 | 3       | 9                 | (100 x 10) + 3                                           | 27081         |
| LR        | Grid     | 3       | 9                 | (27 x 10) + 3                                            | 7371          |
| LR        | Random 1 | 3       | 9                 | (100 x 10) + 3                                           | 27081         |
| LR        | Random 2 | 3       | 9                 | (100 x 10) + 3                                           | 27081         |
| DNN       | Grid     | 3       | 9                 | (72 x 10) + 3                                            | 19521         |
| DNN       | Random 1 | 3       | 9                 | (100 x 10) + 3                                           | 27081         |
| DNN       | Random 2 | 3       | 9                 | (100 x 10) + 3                                           | 27081         |
| NB        | Grid     | 3       | 9                 | (1 x 10) + 3                                             | 351           |
| NB        | Random 1 | 3       | 9                 | (1 x 10) + 3                                             | 351           |
| NB        | Random 2 | 3       | 9                 | (1 x 10) + 3                                             | 351           |
| RF        | Grid     | 3       | 9                 | (45 x 10) + 3                                            | 12231         |
| RF        | Random 1 | 3       | 9                 | (100 x 10) + 3                                           | 27081         |
| RF        | Random 2 | 3       | 9                 | (100 x 10) + 3                                           | 27081         |
| SVM       | Grid     | 2       | 9                 | (40 x 10) + 3                                            | 7254          |
| SVM       | Random 1 | 2       | 9                 | (10 x 10) + 3                                            | 1854          |
| SVM       | Random 2 | 2       | 9                 | (10 x 10) + 3                                            | 1854          |
|           |          |         |                   |                                                          | <b>345330</b> |
